# Supplementary material for: La supresión del rol de "víctima pasiva": I Congreso Internacional sobre Justicia Restaurativa y Mediación Penal
Source: MDPI journal article supplement (doi:10.3390/ijms25084138), 2010-01-01
Supplement: s1 [file s1]

**Table S1: Primers**

| <b>Gene</b>             | <b>Sequence</b>          | <b>Rationale</b>                      |
|-------------------------|--------------------------|---------------------------------------|
| <b><i>GAPDH</i></b>     |                          |                                       |
| Forward                 | CTCCTCCACCTT TGACGCTG    | Housekeeping                          |
| Reverse                 | TCCCTCTGTGCTCTTGCTG      |                                       |
| <b><i>TFAP2A</i></b>    |                          |                                       |
| Forward                 | TAAAGCTGCCAACGTTACCC     | Non-neural ectoderm                   |
| Reverse                 | GCACACGTACCCAAAGTCC      |                                       |
| <b><i>DLX3</i></b>      |                          |                                       |
| Forward                 | AGCCTCCTACCGGCAATAC      | Non-neural ectoderm                   |
| Reverse                 | TTCCGGCTCCTCCTTCAC       |                                       |
| <b><i>DLX5</i></b>      |                          |                                       |
| Forward                 | GCTAGCTCCTACCACCAGTAC    | Non-neural ectoderm                   |
| Reverse                 | GGTTTGCCATTACCAATTCTCA   |                                       |
| <b><i>OCT4</i></b>      |                          |                                       |
| Forward                 | ACCCCTGGTGCCGTGAA        | Pluripotency                          |
| Reverse                 | GGCTGAATACCT TCCCAAATA   |                                       |
| <b><i>K18</i></b>       |                          |                                       |
| Forward                 | CTCTGTCCAGGCGCCCAGCT     | Surface ectoderm                      |
| Reverse                 | CCCCTGAAGCTGGTGGAG       |                                       |
| <b><i>SOX1</i></b>      |                          |                                       |
| Forward                 | CAACTCGCAGGGCTACATGA     | Neural ectoderm                       |
| Reverse                 | CTCCGACTTCACCAGAGAGC     |                                       |
| <b><i>SIX1</i></b>      |                          |                                       |
| Forward                 | GGTTTAAGAACCGGAGGCAAA    | Pan-placodal ectoderm                 |
| Reverse                 | TGCTTGTTGGAGGAGGAGTTA    |                                       |
| <b><i>Brachyury</i></b> |                          |                                       |
| Forward                 | ATGAGCCTCGAATCCACATAGT   | Mesoderm                              |
| Reverse                 | TCCTCGTTCTGATAAGCAGTCA   |                                       |
| <b><i>FOXA2</i></b>     |                          |                                       |
| Forward                 | GAGCAGCAGCGGGCGAGTTA     | Endoderm                              |
| Reverse                 | CCCAGGCCGGCGTTCATGTT     |                                       |
| <b><i>EYA1</i></b>      |                          |                                       |
| Forward                 | ACAGCCGACGGGTCTTTAA      | Pan-placodal ectoderm                 |
| Reverse                 | TTGGTCGTGGGCTGAAACTA     |                                       |
| <b><i>PITX2</i></b>     |                          |                                       |
| Forward                 | AGTCCGGGTTTGGTTCAAGA     | Dental epithelial and Oral epithelial |
| Reverse                 | TGGATAGGGAGGCGGATGTA     |                                       |
| <b><i>PITX1</i></b>     |                          |                                       |
| Forward                 | GTGGCGTAAGCGCGAGCGTAA    | Oral epithelial                       |
| Reverse                 | GACAGCGGGCTCATGGAGTTGAAG |                                       |
| <b><i>AMBN</i></b>      |                          |                                       |
| Forward                 | AGAGCACAGTGCATGTCAGC     | Dental epithelial and Ameloblast      |
| Reverse                 | AAGAACGGCACTGCAAACT      |                                       |
| <b><i>SP6</i></b>       |                          |                                       |
| Forward                 | GGACTTCTCGCAGGGCTATG     | Dental epithelial and Ameloblast      |
| Reverse                 | GCTGCAGGAGCTTGGAAAAG     |                                       |

**Table S2: Antibodies**

| Antibodies | Supplier    | Identifier |
|------------|-------------|------------|
| TFAP2A     | Santa Cruz  | sc-12726   |
| OCT4       | Santa Cruz  | sc-5279    |
| SIX1       | Proteintech | 10709-1-AP |
| PITX2      | Santa Cruz  | sc-390457  |
| PITX1      | Santa Cruz  | sc-271435  |
| AMBN       | Santa Cruz  | sc-271012  |
| AMELX      | Santa Cruz  | sc-365284  |
| SOX2       | Abclonal    | A0561      |
| Ki67       | Abmart      | TW0001     |

**A**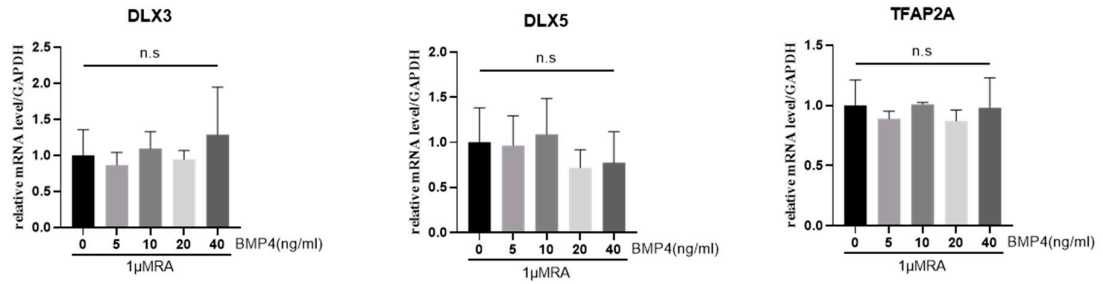**B**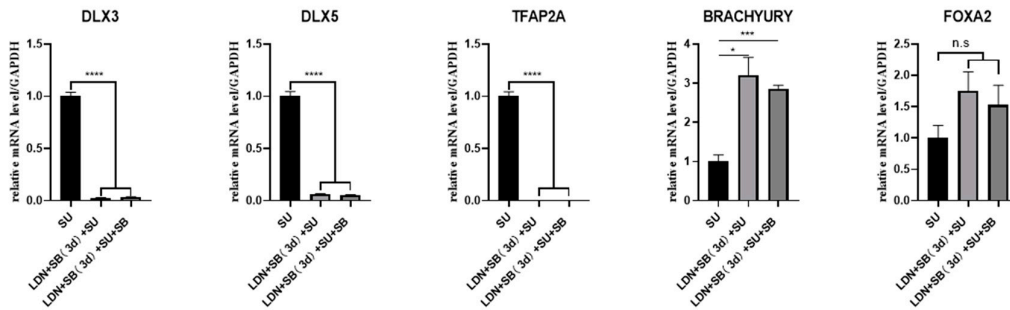

**Figure S1.** Selection of induction conditions for acquisition of NNE fate. **A.** qRT-PCR analysis revealed the expression of non-neural ectoderm (NNE) markers TFAP2A, DLX3, and DLX5 in response to the stimulation of 1 μM RA in combination with BMP4 at various concentrations. **B.** qRT-PCR analysis revealed the expression of TFAP2A, DLX3, DLX5, Brachyury, and FOXA2 subsequent to the addition of LDN and SB during the early stages of differentiation. Data shown are mean ± SEM of three independent experiments (three technical replicates per biological replicate). \*,  $p < 0.05$ , \*\*\*,  $p < 0.001$ , \*\*\*\*,  $p < 0.0001$  and n.s, not significant.
